# Supplementary material for: Developmental constraint shaped genome evolution and erythrocyte loss in Antarctic fishes following paleoclimate change
Source: PubMed Central journal article supplement (PMC7660546; doi:10.1371/journal.pgen.1009173), 2020-10-27
Supplement: pgen.1009173.s016.pdf [file pgen.1009173.s016.pdf]

**S4 Table. Coverage and mutations in candidate erythrocyte genes**

| Ensembl ID          | Gene Name | Type                                      | Avg Coverage† | Avg Coverage Icefish† | FE marrow | FE erythrocytes | Pleiotropy Score | Truncating variant (s) ‡ |
|---------------------|-----------|-------------------------------------------|---------------|-----------------------|-----------|-----------------|------------------|--------------------------|
| ENSGACG00000006807  | Alas2     | heme and hemoglobin biosynthesis          | 97.8%         | 100.0%                | 6.58      | 2.09            | 0                | ✓                        |
| ENSGACG00000001091  | Dmtn      | cytoskeleton                              | 91.2%         | 94.1%                 | 0.37      | 6.30            | 0                |                          |
| ENSGACG000000017373 | Hemgn     | development/transcription factors         | 95.7%         | 100.0%                | 1.61      | 5.18            | 0                | ✓                        |
| ENSGACG000000013918 | Hbb       | heme and hemoglobin biosynthesis          | 78.9%         | 13.0%                 | 8.59      | 2.70            | 0                | ✓                        |
| ENSGACG000000014492 | Hba       | heme and hemoglobin biosynthesis          | 81.0%         | 37.2%                 | 4.99      | 2.56            | 0                | ✓                        |
| ENSGACG00000009865  | Rhag      | membrane proteins and solute transporters | 71.9%         | 73.7%                 | 23.77     | 6.82            | 0                |                          |
| ENSGACG000000015628 | Gypc      | cytoskeleton                              | 81.6%         | 100.0%                | 1.37      | 1.72            | 0                |                          |
| ENSGACG00000007369  | Rhd       | membrane proteins and solute transporters | 94.3%         | 98.4%                 | 5.54      | 8.88            | 0                | ✓                        |
| ENSGACG000000007574 | Slc25a28  | membrane proteins and solute transporters | 96.8%         | 99.8%                 | 0.58      | 0.32            | 0                |                          |
| ENSGACG000000001549 | Tfcp2     | development/transcription factors         | 96.1%         | 99.5%                 | 0.16      | 0.69            | 0                |                          |
| ENSGACG000000009512 | Eif2ak1   | heme and hemoglobin biosynthesis          | 73.6%         | 74.5%                 | 0.49      | 1.69            | 1                |                          |
| ENSGACG000000007530 | Slc25a38  | membrane proteins and solute transporters | 96.1%         | 100.0%                | 0.54      | 3.16            | 1                |                          |
| ENSGACG000000007468 | Car6      | carbonic anhydrases                       | 97.8%         | 100.0%                | 0.00      | 0.25            | 1                |                          |
| ENSGACG000000007890 | Car3      | carbonic anhydrases                       | 74.8%         | 80.9%                 | 0.00      | 0.18            | 1                |                          |
| ENSGACG000000016482 | Hmgb2     | development/transcription factors         | 95.5%         | 100.0%                | 3.16      | 0.78            | 1                |                          |
| ENSGACG000000002257 | Kdm1b     | development/transcription factors         | 97.8%         | 100.0%                | 0.40      | 0.13            | 1                |                          |
| ENSGACG000000008971 | Isg15     | development/transcription factors         | 62.2%         | 63.1%                 | 0.67      | 0.57            | 1                |                          |
| ENSGACG000000012154 | Aqp9      | membrane proteins and solute transporters | 97.5%         | 100.0%                | 0.11      | 0.57            | 2                |                          |
| ENSGACG000000010765 | Slc25a37  | membrane proteins and solute transporters | 91.2%         | 93.4%                 | 1.64      | 0.94            | 2                |                          |
| ENSGACG000000014377 | Urod      | heme and hemoglobin biosynthesis          | 97.7%         | 100.0%                | 0.91      | 3.53            | 2                |                          |
| ENSGACG000000003213 | Car5b     | carbonic anhydrases                       | 95.5%         | 99.9%                 | 0.07      | 0.03            | 2                |                          |
| ENSGACG000000015396 | Car7      | carbonic anhydrases                       | 97.3%         | 100.0%                | 0.00      | 1.00            | 2                |                          |
| ENSGACG000000018021 | Alad      | heme and hemoglobin biosynthesis          | 97.7%         | 100.0%                | 0.33      | 5.84            | 3                |                          |
| ENSGACG000000001433 | Epb41     | cytoskeleton                              | 95.0%         | 98.2%                 | 0.80      | 0.56            | 3                |                          |
| ENSGACG000000001495 | Trf       | heme and hemoglobin biosynthesis          | 96.2%         | 99.7%                 | 0.00      | 0.01            | 3                |                          |
| ENSGACG000000004180 | Ppox      | heme and hemoglobin biosynthesis          | 83.2%         | 87.7%                 | 0.44      | 2.33            | 3                |                          |
| ENSGACG000000018597 | Tmod1     | cytoskeleton                              | 91.5%         | 94.5%                 | 0.15      | 1.25            | 3                |                          |
| ENSGACG000000012574 | Slc2a1    | membrane proteins and solute transporters | 96.0%         | 99.9%                 | 0.17      | 0.02            | 3                |                          |
| ENSGACG000000011803 | Car14     | carbonic anhydrases                       | 96.9%         | 99.9%                 | 0.02      | 0.03            | 3                |                          |
| ENSGACG000000018705 | Chd4      | development/transcription factors         | 96.5%         | 99.5%                 | 0.33      | 0.35            | 3                |                          |
| ENSGACG000000020462 | Crebrf    | development/transcription factors         | 96.8%         | 100.0%                | 1.12      | 0.14            | 4                |                          |
| ENSGACG000000018134 | Gfi1b     | development/transcription factors         | 97.1%         | 100.0%                | 15.87     | 2.75            | 4                |                          |
| ENSGACG000000009442 | Nfe2      | development/transcription factors         | 97.2%         | 100.0%                | 5.76      | 0.27            | 4                |                          |
| ENSGACG000000013189 | Add2      | cytoskeleton                              | 90.4%         | 91.2%                 | 0.90      | 7.34            | 4                |                          |
| ENSGACG000000008037 | Ftl1      | heme and hemoglobin biosynthesis          | 97.5%         | 100.0%                | 0.34      | 0.32            | 4                |                          |
| ENSGACG000000003384 | Xk        | membrane proteins and solute transporters | 97.8%         | 99.9%                 | 0.70      | 2.18            | 4                |                          |
| ENSGACG000000019222 | Bcl11a    | development/transcription factors         | 97.5%         | 100.0%                | 0.26      | 0.65            | 4                |                          |

| Ensembl ID         | Gene Name | Type                                      | Avg Coverage† | Avg Coverage Icefish† | FE marrow | FE erythrocytes | Pleiotropy Score | Truncating variant (s) ‡ |
|--------------------|-----------|-------------------------------------------|---------------|-----------------------|-----------|-----------------|------------------|--------------------------|
| ENSGACG00000019143 | Klf1      | development/transcription factors         | 96.0%         | 100.0%                | 25.70     | 7.32            | 5                |                          |
| ENSGACG00000009874 | Lmo2      | development/transcription factors         | 97.7%         | 100.0%                | 0.66      | 0.49            | 5                |                          |
| ENSGACG00000016373 | Tfrc      | heme and hemoglobin biosynthesis          | 94.8%         | 100.0%                | 1.10      | 1.98            | 6                |                          |
| ENSGACG00000010082 | Cpox      | heme and hemoglobin biosynthesis          | 97.6%         | 100.0%                | 1.04      | 6.33            | 6                |                          |
| ENSGACG00000011054 | Myb       | development/transcription factors         | 96.3%         | 99.9%                 | 0.77      | 0.20            | 6                |                          |
| ENSGACG00000002554 | Zfpm1     | development/transcription factors         | 96.5%         | 98.7%                 | 0.42      | 0.81            | 6                |                          |
| ENSGACG00000005173 | Hmbs      | heme and hemoglobin biosynthesis          | 94.7%         | 97.3%                 | 5.39      | 5.59            | 6                |                          |
| ENSGACG00000012004 | Flvcr1    | heme and hemoglobin biosynthesis          | 55.7%         | 63.1%                 | 0.19      | 0.58            | 6                |                          |
| ENSGACG00000013741 | Dntm1     | development/transcription factors         | 97.2%         | 99.8%                 | 0.54      | 0.50            | 6                |                          |
| ENSGACG00000006591 | Ets1      | development/transcription factors         | 97.5%         | 100.0%                | 0.07      | 0.00            | 6                |                          |
| ENSGACG00000013704 | Jak2      | development/transcription factors         | 97.5%         | 100.0%                | 0.51      | 0.43            | 6                |                          |
| ENSGACG00000017365 | Jak2      | development/transcription factors         | 97.5%         | 100.0%                | 0.51      | 0.43            | 6                |                          |
| ENSGACG00000009622 | Slc4a1    | membrane proteins and solute transporters | 92.1%         | 94.8%                 | 7.93      | 2.74            | 7                |                          |
| ENSGACG00000015484 | Fth1      | heme and hemoglobin biosynthesis          | 96.5%         | 100.0%                | 1.18      | 0.60            | 7                |                          |
| ENSGACG00000000651 | Fech      | heme and hemoglobin biosynthesis          | 94.1%         | 96.8%                 | 2.25      | 4.07            | 8                |                          |
| ENSGACG00000018336 | Ldb1      | development/transcription factors         | 96.8%         | 99.8%                 | 0.44      | 0.60            | 8                |                          |
| ENSGACG00000015635 | Sox6      | development/transcription factors         | 97.8%         | 100.0%                | 0.64      | 1.11            | 8                |                          |
| ENSGACG00000010218 | Gata1     | development/transcription factors         | 96.7%         | 100.0%                | 19.53     | 2.31            | 8                |                          |
| ENSGACG00000002608 | Uros      | heme and hemoglobin biosynthesis          | 95.4%         | 100.0%                | 0.51      | 5.32            | 8                |                          |
| ENSGACG00000004999 | Car2      | carbonic anhydrases                       | 96.9%         | 99.0%                 | 0.14      | 4.73            | 8                |                          |
| ENSGACG00000009013 | Acvr1ba   | development/transcription factors         | 97.7%         | 100.0%                | 0.15      | 0.01            | 8                |                          |
| ENSGACG00000000719 | Acvr1bb   | development/transcription factors         | 97.8%         | 100.0%                | 0.15      | 0.01            | 8                |                          |
| ENSGACG00000017383 | Aqp1      | membrane proteins and solute transporters | 97.8%         | 100.0%                | 0.07      | 5.00            | 9                |                          |
| ENSGACG00000009608 | Gata2     | development/transcription factors         | 96.9%         | 99.7%                 | 0.04      | 0.05            | 9                |                          |
| ENSGACG00000013846 | Tal1      | development/transcription factors         | 97.6%         | 100.0%                | 1.77      | 1.03            | 9                |                          |
| ENSGACG00000011100 | Sptb      | cytoskeleton                              | 95.1%         | 97.5%                 | 0.89      | 5.58            | 10               |                          |
| ENSGACG00000009679 | Kdm1a     | development/transcription factors         | 97.7%         | 100.0%                | 0.21      | 0.42            | 10               |                          |
| ENSGACG00000008634 | Stat5a    | development/transcription factors         | 97.6%         | 100.0%                | 0.49      | 0.46            | 10               |                          |
| ENSGACG00000015405 | Stat5b    | development/transcription factors         | 97.1%         | 99.8%                 | 0.38      | 0.19            | 11               |                          |
| ENSGACG00000009373 | Kitl      | development/transcription factors         | 95.7%         | 100.0%                | 0.01      | 0.01            | 12               |                          |
| ENSGACG00000017699 | Ank1      | cytoskeleton                              | 97.1%         | 100.0%                | 0.14      | 6.67            | 12               |                          |
| ENSGACG00000015083 | Acvr2a    | development/transcription factors         | 97.7%         | 99.6%                 | 0.09      | 0.11            | 13               |                          |
| ENSGACG00000015589 | Stat1     | development/transcription factors         | 96.2%         | 99.6%                 | 0.19      | 0.14            | 13               |                          |
| ENSGACG00000008910 | Foxo3     | development/transcription factors         | 98.1%         | 100.0%                | 0.81      | 0.47            | 16               |                          |

† Average coverage across dataset at a minimum depth of 4x reads

‡ Whole gene deletion or truncating variant (nonsense, frameshift) in at least one icefish lineage
